# Supplementary material for: Adaptive laboratory evolution of a genome-reduced Escherichia coli
Source: PubMed Central journal article supplement (PMC6389913; doi:10.1038/s41467-019-08888-6), 2019-02-25
Supplement: 41467_2019_8888_MOESM3_ESM.pdf [file 41467_2019_8888_MOESM3_ESM.pdf]

**Title:** Supplementary Data 1.

**Description:** Final readout of phenotype microarray.

**Title:** Supplementary Data 2.

**Description:** Sequence variations detected by genome re-sequencing.

**Title:** Supplementary Data 3.

**Description:** Sequence variations detected by genome re-sequencing of MG1655 ALE experiment.

**Title:** Supplementary Data 4.

**Description:** Sequence variations detected by genome re-sequencing of 300 generations of additional ALE experiment.

**Title:** Supplementary Data 5.

**Description:** Peak detected from ChIP-seq. UTR, un-translated region. S: shared. D: deleted in MS56. M: MG1655-specific. E: eMS57-specific.

**Title:** Supplementary Data 6.

**Description:** Expression level of revealed by RNA-Seq. Statistical significance was tested by Welch's t-test. RPKM; reads per kilobase per million mapped reads.

**Title:** Supplementary Data 7.

**Description:** Translation level (RPF) revealed by Ribo-Seq. Translational efficiency is defined as translation level divided by transcription level. RPKM; Reads per kilobase per million mapped reads.
